# Supplementary material
Source: PubMed Central journal article supplement (PMC4732962)
Supplement: supp_140665_140665-guide-2-at.pdf [file supp_140665_140665-guide-2-at.pdf]

**Appendix 2 (as supplied by the authors):** Updated search for the period March 2013 to July 14, 2015, for studies pertaining to treatments recommended by these guidelines

| Year | Author and study title                                                                                                                                                                                     | Acne severity   | Drug                                             | Comparator                                                                                   | Randomization           | Blinding (single, double) | ITT       | Differences between groups | Trial size               | N in each arm | Overall drop outs       | Drop outs due to SEs | Drop outs due to inefficiveness | Week of evaluation | Δ in TL | Δ in IL | Δ in NIL      | Comments                                                                                                              | Consensus grade        |
|------|------------------------------------------------------------------------------------------------------------------------------------------------------------------------------------------------------------|-----------------|--------------------------------------------------|----------------------------------------------------------------------------------------------|-------------------------|---------------------------|-----------|----------------------------|--------------------------|---------------|-------------------------|----------------------|---------------------------------|--------------------|---------|---------|---------------|-----------------------------------------------------------------------------------------------------------------------|------------------------|
| 2014 | Tan et al. A treatment for severe nodular acne: a randomized investigator-blinded, controlled, noninferiority trial comparing fixed-dose adapalene/benzoyl peroxide plus doxycycline vs. oral isotretinoin | severe, nodular | fixed-dose adapalene/BPO and doxy200, once daily | isotretinoin oral 0.5mg/kg for 4 weeks then 1mg/kg for 16 weeks, cumulative dose of 126mg/kg | RANU NI from SAS, 1:1   | single (investigator)     | Yes, LOCF | No                         | 226 (217 in PP analysis) | 133           | 28 (doxy A/BPO) 17(iso) | 6(A/bPO) 4(A/bPO)    | 1 (A/BPO) 0(iso)                | 20                 | N/A     | N/A     | N/A           | was composite success (>=75% reduction of nodules, absence of safety issues) of 63.9% (A/BPO) vs 54.9%); single blind | A                      |
| 2014 | Jacobs et al. Systematic review on the rapidity of the onset of action of topical treatments in the therapy of mild-to-moderate acne vulgaris                                                              | N/A             | N/A                                              | N/A                                                                                          | N/A                     | N/A                       | N/A       | N/A                        | N/A                      | N/A           | N/A                     | N/A                  | N/A                             | N/A                | N/A     | N/A     | N/A           | [BPO] and [ada] make no difference, BPO> tretinoin, clinda/BPO > adap, Adap> tretinoin, clin/BPO =ada/BPO             | A                      |
| 2014 | El-Latif. Intense pulsed light versus benzoyl peroxide 5% gel in treatment of acne                                                                                                                         | mild to severe  | IPL                                              | BPO5%                                                                                        | No, "randomly selected" | No                        |           |                            |                          |               |                         |                      |                                 |                    |         |         | not conducted | not RCT, too short; many unclear details                                                                              | NC (C, do not include) |
| 2013 | Mohd Nor et al. A systematic review of benzoyl peroxide for acne vulgaris                                                                                                                                  | N/A             | BPO                                              | N/A                                                                                          | N/A                     | N/A                       | N/A       | N/A                        | N/A                      | N/A           | N/A                     | N/A                  | N/A                             | N/A                | N/A     | N/A     | N/A           | well designed; interesting conclusion: BPO may work but evidence are not firm                                         | A                      |

|      |                                                                                                                                                                                                                    |                              |                        |                                      |                     |                          |     |            |     |                        |     |                       |   |   |                                     |                                                         |            |            |                                                                                                                                          |   |
|------|--------------------------------------------------------------------------------------------------------------------------------------------------------------------------------------------------------------------|------------------------------|------------------------|--------------------------------------|---------------------|--------------------------|-----|------------|-----|------------------------|-----|-----------------------|---|---|-------------------------------------|---------------------------------------------------------|------------|------------|------------------------------------------------------------------------------------------------------------------------------------------|---|
| 2013 | Kar et al. Comparative study of oral isotretinoin versus oral isotretinoin + 20% salicylic acid peel in the treatment of active acne study of oral isotretinoin versus oral isotretinoin + 20% salicylic           | mod to severe                | oral 20mg isotretinoin | oral isotretinoin +20% sal acid peel | random number table | single (assessor)        | ?   | No         | 60  | 30                     | ?   | ?                     | ? | ? | 16                                  | MASI score                                              | MASI score | MASI score | hard to assess due to MASI score; 20 mg for 16 weeks is not a the routine regimen                                                        | B |
| 2014 | Webster et al. Results of a Phase III, double-blind, randomized, parallel-group, non-inferiority study evaluating the safety and efficacy of isotretinoin-Lidose in patients with severe recalcitrant nodular acne |                              | isotretinoin-lidose    | generic isotretinoin                 | block               | double                   | yes | no         | 925 | 464 liose, 461 generic | 130 | 19 lidose, 15 generic | ? | ? | 16                                  | 76.9 % reduction in nodules in lidose, 81% with generic |            |            | noninferioirty                                                                                                                           | A |
| 2013 | Bettoli et al. Maintenance therapy for acne vulgaris: efficacy of a 12-month treatment with adapalene-benzoyl peroxide after oral isotretinoin and a review of the literature.                                     | severe, recalcitrant nodular | adapalene BPO          | oral isotretinoin                    | None                | open label, not compared | no  | not stated | 69  |                        | 1   | none                  | ? | ? | q12 weeks, 12 mos total, q 12 weeks | n/a                                                     | n/a        | n/a        | relapse in 3%, a few others did not meet criteria for relapse and treated with addition of clindamycin. prob should not have been graded | C |

|      |                                                                                                                                                        |               |                   |                                    |                      |                                       |           |     |     |     |     |     |     |                                                                                |                                   |                                       |                                       |                                                                                                                                |   |
|------|--------------------------------------------------------------------------------------------------------------------------------------------------------|---------------|-------------------|------------------------------------|----------------------|---------------------------------------|-----------|-----|-----|-----|-----|-----|-----|--------------------------------------------------------------------------------|-----------------------------------|---------------------------------------|---------------------------------------|--------------------------------------------------------------------------------------------------------------------------------|---|
| 2014 | Rademaker et al. Isotretinoin 5 mg daily for low-grade adult acne vulgaris--a placebo-controlled, randomized double-blind                              | low grade     | 5mg isotretinoin  | placebo                            | yes                  | RCT 16 weeks then open label 16 weeks | yes, LOCF | no  | 60  | 29  | 15  | 3   | ?   | weekly visit to 36 weeks, then final visit at 42 weeks: at 16 weeks evaluation | 3.2 at 16 weeks vs 8.6 in placebo | not stated                            | not stated                            | Adds to evidence concerning low dose isotretinoin                                                                              | A |
| 2014 | Koo et al. Meta-analysis comparing efficacy of antibiotics versus oral contraceptives in acne vulgaris                                                 | any?          | N/A               | N/A                                | N/A                  | N/A                                   | N/A       | N/A | N/A | N/A | N/A | N/A | N/A | N/A                                                                            | N/A                               | N/A                                   | N/A                                   | not a systematic review; only searched pubmed; did not evaluate bias, not sure why they excluded crossover, unless stats issue | B |
| 2014 | Faghihi et al. The efficacy of 5% dapsone gel plus oral isotretinoin versus oral isotretinoin alone in acne vulgaris: A randomized double-blind study. | mod to severe | oral isotretinoin | oral isotretinoin + 5% dapsone gel | yes but not sure how | double blind                          | yes       | No  | 58  | 29  | 0   | 0   | 0   | 12                                                                             | not stated                        | change is significant, but not stated | change is significant, but not stated | cannot add anything because we don't know if it was a 10% reduction                                                            | B |
| 2014 | Application of intense pulsed light in the treatment of dermatologic disease: a systematic review                                                      | N/A           | N/A               | N/A                                | N/A                  | N/A                                   | N/A       | N/A | N/A | N/A | N/A | N/A | N/A | N/A                                                                            | N/A                               | N/A                                   | N/A                                   | IPL alone: studies at 8weeks eval, graded 2b; IPL-PDT graded 1b                                                                | A |

|      |                                                                                                                                                                                                                                                              |               |                   |                            |                                               |                     |           |                                                                                         |                                 |                                        |                                     |                                            |         |     |            |                                                                                                                  |            |                                                                                                                                                                                                                                       |   |
|------|--------------------------------------------------------------------------------------------------------------------------------------------------------------------------------------------------------------------------------------------------------------|---------------|-------------------|----------------------------|-----------------------------------------------|---------------------|-----------|-----------------------------------------------------------------------------------------|---------------------------------|----------------------------------------|-------------------------------------|--------------------------------------------|---------|-----|------------|------------------------------------------------------------------------------------------------------------------|------------|---------------------------------------------------------------------------------------------------------------------------------------------------------------------------------------------------------------------------------------|---|
| 2014 | Murray et al. The phototoxic and photoallergy potential of clindamycin phosphate 1.2%/tretinoin 0.025% gel for facial acne: results of two single-center, evaluator-blinded, randomized, vehicle-controlled phase 1 studies in healthy volunteers            | N/A           | CTG: 1.2% 0.025 % | vehicle                    | all patients had vehicle, CTG and blank patch | single (assessor)   | No        | N/A                                                                                     | 37 phototoxic, 58 photoallergic | N/A                                    | 1 phototoxic, 8 photoallergic study | 0 phototoxic; 2 photoallergic              | N/A     | N/A | N/A        | N/A                                                                                                              | N/A        | low rate of Aes                                                                                                                                                                                                                       | B |
| 2015 | Moore et al. Efficacy and Safety of Subantimicrobial Dose, Modified-Release Doxycycline 40 mg Versus Doxycycline 100 mg Versus Placebo for the treatment of Inflammatory Lesions in Moderate and Severe Acne: A Randomized, Double-Blinded, Controlled Study | mod to severe | doxy 40 daily     | placebo and doxy 100 daily | 1:1:1, unsure how                             | stated double blind | Yes, LOCF | yes; more severe acne in placebo group; more NIL in doxy 40 group, although median same | 662                             | 216 doxy 40, 224 doxy 100, 222 placebo | 175                                 | states in text 2 in doxy 40, 5 in doxy 100 | unknown | 16  | not stated | mean change in inflammatory lesion count: doxy 40 16.1 vs 12.6 placebo, 12.9 doxy 100; percent change median num | not stated | this provides better evidence than previous for 40=100. Interesting that doxy 100 is the same as placebo for change in inflammatory lesions. Note that all authors are conflicted. Antimicrobial resistance issue still not addressed | B |

|      |                                                                                                       |          |                                                 |                |                       |        |                   |                              |     |     |     |     |     |       |            |            |            |                                                                                                                      |   |  |  |
|------|-------------------------------------------------------------------------------------------------------|----------|-------------------------------------------------|----------------|-----------------------|--------|-------------------|------------------------------|-----|-----|-----|-----|-----|-------|------------|------------|------------|----------------------------------------------------------------------------------------------------------------------|---|--|--|
|      |                                                                                                       |          |                                                 |                |                       |        |                   |                              |     |     |     |     |     |       |            |            |            | ber:<br>51.6<br>%<br>doxy<br>40,<br>44.3<br>%<br>plac<br>ebo,<br>47.6<br>%<br>doxy<br>100                            |   |  |  |
| 2014 | Ullah et al. Comparison of oral azithromycin with oral doxycycline in the treatment of acne vulgaris. | moderate | azithromycin 500 4 days once a month x 3 months | doxy 100 daily | yes, "lottery method" | unsure | yes, no drop outs | age difference, rest unknown | 386 | 193 | 0   | 0   | 0   | 3 mos | not stated | not stated | not stated | doxy is better but is due to dosing schedule? Daily vs 4 days a month. Also concern re promoting resistance this way | C |  |  |
| 2015 | Cao et al. Complementary therapies for acne vulgaris (cochrane review)                                | N/A      | N/A                                             | N/A            | N/A                   | N/A    | N/A               | N/A                          | N/A | N/A | N/A | N/A | N/A | N/A   | N/A        | N/A        | N/A        | does not change our conclusion for diet; maybe we should include teatree oil and bee venom somewhere in text         | A |  |  |

BPO: benzoyl peroxide; CTG: clindamycin-tretinoin gel; doxy: doxycycline; IL: inflammatory lesions; IPL: intense pulsed light; ITT: intent to treat; TL: total lesions; N/A: information not available; NC: no consensus; NIL: non-inflammatory lesions; SE: side-effects
