# Supplementary material
Source: PubMed Central journal article supplement (PMC4732962)
Supplement: supp_140665_140665-guide-5-at.pdf [file supp_140665_140665-guide-5-at.pdf]

**Appendix 5 (as supplied by the authors): Cost of drugs for each Canadian province and territory**

Drug costs researched and compiled by Tiffany Czilli, B.Sc. Hon., Pharm.D., R.Ph., MD, CCFP

| Therapy                       | ODB  | NB   | PEI  | NS    | NL   | QC   | MB   | SK   | AB   | BC   | YT   | NWT  | NUN  | K&F  | McK  |
|-------------------------------|------|------|------|-------|------|------|------|------|------|------|------|------|------|------|------|
| <b>Topical retinoids</b>      |      |      |      |       |      |      |      |      |      |      |      |      |      |      |      |
| Retin A Cream 0.01% (g)       | nb   | nb   | nb   | nb    | nb   | 0.36 | nb   | nb   | nb   | 0.38 | 0.36 | n/a  | n/a  | n/a  | n/a  |
| Retin A Cream 0.025% (g)      | nb   | nb   | nb   | nb    | nb   | 0.36 | nb   | 0.38 | nb   | 0.38 | 0.36 | n/a  | n/a  | n/a  | n/a  |
| Retin A Cream 0.05% (g)       | nb   | nb   | nb   | 0.38  | nb   | 0.35 | nb   | 0.38 | nb   | 0.42 | 0.37 | 0.41 | 0.41 | 0.41 | 0.41 |
| Retin A Cream 0.1% (g)        | nb   | nb   | nb   | nb    | nb   | nb   | nb   | nb   | nb   | 0.38 | 0.37 | n/a  | n/a  | n/a  | n/a  |
| Retin A Gel 0.01% (g)         | nb   | nb   | nb   | nb    | nb   | nb   | nb   | 0.75 | nb   | nb   | 0.37 | nb   | nb   | n/a  | n/a  |
| Retin A Gel 0.025% (g)        | nb   | nb   | nb   | 0.38  | nb   | 0.35 | nb   | 0.38 | nb   | 0.42 | 0.37 | nb   | nb   | 0.41 | 0.41 |
| Retin A Micro Gel 0.04% (g)   | nb   | nb   | nb   | nb    | nb   | nb   | nb   | nb   | nb   | nb   | nb   | nb   | nb   | 0.79 | 0.79 |
| Retin A Micro Gel 0.1% (g)    | nb   | nb   | nb   | nb    | nb   | nb   | nb   | nb   | nb   | nb   | nb   | nb   | nb   | 0.79 | 0.79 |
| Differin Cream (g)            | nb   | nb   | nb   | nb    | nb   | nb   | nb   | 1.49 | nb   | nb   | nb   | 1.57 | 1.57 | 1.57 | 1.57 |
| Differin Gel (g)              | nb   | nb   | nb   | nb    | nb   | nb   | nb   | 1.49 | nb   | nb   | 1    | 1.57 | 1.57 | 1.57 | 1.57 |
| Differin Pledget 0.1% (g)     | nb   | nb   | nb   | nb    | nb   | nb   | nb   | nb   | nb   | nb   | nb   | nb   | nb   | n/a  | n/a  |
| Differin XP (g)               | nb   | nb   | nb   | nb    | nb   | nb   | nb   | nb   | nb   | nb   | nb   | nb   | nb   | 1.05 | 1.05 |
| Stieva A Cream 0.01% (g)      | 0.3  | nb   | nb   | 0.3   | nb   | 0.29 | nb   | 0.3  | 0.3  | 0.32 | 0.29 | 0.3  | 0.32 | 0.32 | 0.32 |
| Stieva A Cream 0.025% (g)     | 0.3  | nb   | nb   | 0.3   | nb   | 0.29 | nb   | 0.3  | 0.3  | 0.32 | 0.29 | 0.3  | 0.32 | 0.32 | 0.32 |
| Stieva A Cream 0.05% (g)      | 0.3  | nb   | nb   | 0.3   | nb   | 0.29 | nb   | 0.3  | 0.3  | 0.32 | 0.29 | 0.3  | 0.32 | 0.32 | 0.32 |
| Stieva A Gel 0.01% (g)        | nb   | nb   | nb   | nb    | nb   | nb   | nb   | nb   | nb   | nb   | 0.29 | nb   | nb   | n/a  | n/a  |
| Stieva A Gel 0.025% (g)       | 0.3  | nb   | nb   | nb    | nb   | 0.29 | nb   | 0.3  | nb   | nb   | 0.29 | 0.32 | 0.32 | 0.32 | 0.32 |
| Stieva A Gel 0.05% (g)        | nb   | nb   | nb   | nb    | nb   | nb   | nb   | 0.3  | nb   | nb   | 0.29 | 0.32 | 0.32 | 0.32 | 0.32 |
| Stieva A Forte 0.1% (g)       | nb   | nb   | nb   | 0.30g | nb   | 0.29 | nb   | 0.3  | 0.3  | nb   | 0.29 | 0.3  | 0.32 | 0.32 | 0.32 |
| Stieva A Solution 0.025% (mL) | nb   | nb   | nb   | nb    | nb   | nb   | nb   | nb   | nb   | nb   | nb   | 0.19 | 0.19 | 0.19 | 0.19 |
| Stieva A Solution 0.05% (mL)  | nb   | nb   | nb   | nb    | nb   | nb   | nb   | nb   | nb   | nb   | nb   | nb   | nb   | n/a  | n/a  |
| Stievamycin Mild (g)          | nb   | nb   | nb   | 0.84  | nb   | nb   | nb   | nb   | 0.84 | 0.9  | 0.54 | 0.84 | 0.91 | 0.91 | 0.91 |
| Stievamycin Gel 0.025/4 (g)   | 0.84 | nb   | nb   | 0.84  | nb   | nb   | nb   | nb   | 0.84 | 0.9  | 0.54 | 0.84 | 0.91 | 0.91 | 0.91 |
| Stievamycin Forte Gel (g)     | nb   | nb   | nb   | 0.84  | nb   | nb   | nb   | nb   | 0.84 | 0.9  | nb   | 0.84 | 0.91 | 0.91 | 0.91 |
| Tazorac 0.05% Crmel (g)       | nb   | nb   | nb   | 1.36  | nb   | nb   | nb   | 1.36 | 1.36 | 1.47 | 1.32 | 1.36 | 1.44 | 1.44 | 1.44 |
| Tazorac 0.1% Crmel (g)        | nb   | nb   | nb   | 1.36  | nb   | nb   | nb   | 1.36 | 1.36 | 1.47 | 1.32 | 1.36 | 1.44 | 1.44 | 1.44 |
| <b>Therapy</b>                |      |      |      |       |      |      |      |      |      |      |      |      |      |      |      |
| Therapy                       | ODB  | NB   | PEI  | NS    | NL   | QC   | MB   | SK   | AB   | BC   | YT   | NWT  | NUN  | K&F  | McK  |
| <b>Antibiotics</b>            |      |      |      |       |      |      |      |      |      |      |      |      |      |      |      |
| Minocycline 50 (t)            | nb   | 0.31 | 0.31 | 0.31  | 0.35 | 0.31 | 0.54 | 0.31 | 0.31 | 0.33 | 0.54 | 0.31 | 0.54 | 0.54 | 0.54 |
| Minocycline 100 (t)           | nb   | 0.59 | 0.59 | 0.59  | 0.68 | 0.59 | 1.03 | 0.59 | 0.59 | 0.64 | 1.03 | 0.59 | 1.03 | 1.03 | 1.03 |
| Minocin 50 (t)                | nb   | 0.31 | 0.31 | nb    | 0.7  | 0.61 | nb   | nb   | nb   | nb   | 0.61 | c    | 0.65 | 0.65 | 0.65 |

|                         |      |      |      |      |      |      |      |      |      |      |          |      |      |      |      |  |
|-------------------------|------|------|------|------|------|------|------|------|------|------|----------|------|------|------|------|--|
| Minocin 100 (t)         | nb   | 0.59 | 0.59 | nb   | 1.36 | nb   | nb   | nb   | nb   | nb   | nb       | c    | 1.25 | 1.25 | 1.25 |  |
| Doxycycline 100 (t)     | nb   | 0.59 | 0.59 | 0.59 | 0.67 | 0.59 | 0.64 | 0.59 | 0.59 | 0.63 | 0.59     | 0.59 | 0.59 | 0.59 | 0.59 |  |
| Tetra 250 (t)           | 0.07 | 0.06 | nb   | 0.07 | nb   | 0.07 | nb   | 0.07 | 0.07 | 0.07 | 0.05     | 0.07 | 0.07 | 0.07 | 0.07 |  |
| Erythromycin 250 (t)    | 0.23 | 0.56 | 0.42 | 0.42 | 0.55 | nb   | nb   | 0.49 | 0.42 | 0.43 | 0.48     | 0.42 | 0.2  | 0.2  | 0.2  |  |
| Apprilon 40 (t)         | nb       | nb   | nb   | 2.69 | 2.69 |  |
| Clindamycin 1% (mL)     | nb   | 0.24 | 0.23 | 0.23 | nb   | 0.18 | 0.25 | 0.23 | nb   | 0.24 | 0.23     | 0.23 | 0.23 | 0.23 | 0.23 |  |
| Dalacin T (mL)          | nb   | 0.24 | 0.23 | 0.23 | nb   | 0.3  | 0.36 | 0.33 | nb   | nb   | 0.33     | 0.35 | 0.35 | 0.35 | 0.35 |  |
| Clindets (wipe)         | nb       | nb   | nb   | 0.72 | 0.72 |  |
| Vibramycin 100 (t)      | nb   | 0.59 | 0.59 | 0.59 | 1.99 | 1.65 | nb   | 1.73 | 1.73 | 0.63 | 1.7      | nb   | nb   | 1.85 | 1.85 |  |
| Hormonal therapies      |      |      |      |      |      |      |      |      |      |      |          |      |      |      |      |  |
| Tri-cyclen 21 (t)       | 0.96 | nb   | nb   | 0.96 | nb   | 0.6  | nb   | 0.99 | 0.83 | 1.04 | 0.73     | 0.83 | 1.03 | 1.03 | 1.03 |  |
| Alesse 21(t)            | 0.71 | 0.46 | 0.46 | 0.46 | 0.83 | 0.61 | 0.78 | 0.71 | 0.71 | 0.5  | 0.69     | 0.71 | 0.77 | 0.77 | 0.77 |  |
| Alysen/Aviane 21 (t)    | 0.46 | 0.46 | 0.46 | 0.46 | 0.53 | 0.46 | 0.46 | 0.46 | 0.46 | 0.5  | 0.46     | 0.46 | 0.46 | 0.46 | 0.46 |  |
| Diane 35 (t)            | nb   | nb   | 1.11 | nb   | nb   | nb   | 1.7  | nb   | nb   | nb   | 1.39/tan | 1.66 | 1.66 | 1.66 | 1.66 |  |
| Cyestra (t)             | nb   | nb   | 1.11 | nb   | nb   | nb   | 1.22 | nb   | nb   | nb   | nb       | 1.2  | 1.2  | 1.2  | 1.2  |  |
| Yaz (t)                 | 0.55 | nb   | nb   | nb   | nb   | 0.42 | nb   | 0.55 | nb   | 0.6  | nb       | 0.58 | 0.58 | 0.58 | 0.58 |  |
| Yasmin 21 (t)           | 0.57 | nb   | nb   | 0.57 | nb   | 0.56 | nb   | 0.57 | 0.57 | 0.62 | 0.69     | 0.57 | 0.6  | 0.6  | 0.6  |  |
| Oral isotretinoin       |      |      |      |      |      |      |      |      |      |      |          |      |      |      |      |  |
| Accutane 10 (t)         | 0.93 | 0.93 | 0.93 | 0.93 | nb   | 0.93 | 1.02 | 0.93 | 0.93 | 1    | 1.7      | 0.93 | 0.98 | 0.98 | 0.98 |  |
| Clarus 10 (generic) (t) | 0.93 | 0.93 | 0.93 | 0.93 | nb   | 0.93 | 1.02 | 93   | 0.93 | 1    | nb       | 0.93 | 0.93 | 0.93 | 0.93 |  |
| Accutane 40 (t)         | 1.9  | 1.9  | 1.9  | 1.9  | nb   | 1.9  | 2.09 | 1.9  | 1.9  | 2.05 | 3.49     | 1.9  | 2.01 | 2.01 | 2.01 |  |
| Clarus 40 (t)           | 1.9  | 1.9  | 1.9  | 1.9  | nb   | 1.9  | 2.09 | 1.9  | 1.9  | 2.05 | nb       | 1.9  | 1.9  | 1.9  | 1.9  |  |
| Epuris 10 (t)           | nb   | ur   | nb   | nb       | nb   | nb   | 1.13 | 1.13 |  |
| Epuris 20 (t)           | nb   | ur   | nb   | nb       | nb   | nb   | 1.52 | 1.52 |  |
| Epuris 30 (t)           | nb   | ur   | nb   | nb       | nb   | nb   | 1.91 | 1.91 |  |
| Epuris 40 (t)           | nb   | ur   | nb   | nb       | nb   | nb   | 2.31 | 2.31 |  |
| Therapy                 | ODB  | NB   | PEI  | NS   | NL   | QC   | MB   | SK   | AB   | BC   | YT       | NWT  | NUN  | K&F  | McK  |  |
| Topical combinations    |      |      |      |      |      |      |      |      |      |      |          |      |      |      |      |  |
| Benzaclin (g)           | 0.92 | nb   | nb   | nb   | nb   | nb   | nb   | 0.92 | 0.91 | nb   | 0.85     | nb   | nb   | 0.98 | 0.98 |  |
| Benzac 10 AC Gel (g)    | nb   | 0.36 | 0.27     | 0.35 | 0.35 | 0.35 | 0.35 |  |
| Benzac W10 Wash (g)     | nb   | 0.15 | 0.11     | 0.14 | 0.14 | 0.14 | 0.14 |  |
| Clindoxyl (g)           | 0.91 | nb   | nb   | nb   | nb   | nb   | nb   | 0.92 | 0.91 | nb   | 0.89     | nb   | nb   | 0.91 | 0.91 |  |
| Tactuo (g)              | nb       | nb   | nb   | 1.57 | 1.57 |  |
| Biacna (g)              | nb       | nb   | nb   | 1.11 | 1.11 |  |
| Dapsone                 |      |      |      |      |      |      |      |      |      |      |          |      |      |      |      |  |
| Aczone (g)              | nb       | nb   | nb   | 1.09 | 1.09 |  |

|                            |      |    |    |      |    |     |    |      |      |      |      |     |      |      |      |  |
|----------------------------|------|----|----|------|----|-----|----|------|------|------|------|-----|------|------|------|--|
| Benzoyl Peroxide           |      |    |    |      |    |     |    |      |      |      |      |     |      |      |      |  |
| Panoxyl 10 (g)             | 0.15 | nb | nb | nb   | nb | nb  | nb | 0.14 | nb   | 0.16 | 0.15 | c   | 0.15 | 0.15 | 0.15 |  |
| Panoxyl 20 (g)             | 0.19 | nb | nb | nb   | nb | nb  | nb | 0.19 | nb   | 0.21 | 0.19 | c   | 0.2  | 0.2  | 0.2  |  |
| Sulfacet (g)               | nb   | nb | nb | 0.99 | nb | nb  | nb | 0.99 | 0.98 | 1.07 | 0.88 | nb  | 1.05 | 1.05 | 1.05 |  |
| Finacea (azelaic acid) (g) | nb   | nb | nb | 0.6  | nb | 0.6 | nb | 0.6  | 0.6  | 0.65 | nb   | 0.6 | 0.63 | 0.63 | 0.63 |  |

ODB: Ontario Drug Benefit; NB: New Brunswick; PEI: Prince Edward Island; NS: Nova Scotia; NL: Newfoundland and Labrador; QC: Quebec; MB: Manitoba; SK: Saskatchewan; AB: Alberta; BC: British Columbia; YT: Yukon; NWT: Northwest Territories; NUN: Nunavut; K&F: Kohl and Frisch; McK: McKesson Ontario

All figures given in Canadian dollars; nb: not a benefit for indicated formulary; n/a: not supplied by wholesaler g:gram; mL:millilitre; t: tablet
